# Supplementary material
Source: publisher site journal article supplement (https://www.dovepress.com/article/551284)
Supplement: Supplementary file 1 [file Supplementary%20Materials_1_1_1.docx]

**Supplementary Materials**

**Supplementary Tables**

Table S1. Twelve inflammatory biomarkers evaluated in this study.

| Biomarker name | Biomarker components | | |
| --- | --- | --- | --- |
| Pan-immune-inflammation value (PIV) | Neutrophil (/μl) × platelet (/μl) × monocyte (/μl) / lymphocyte (/μl) | | |
| Neutrophil-to-lymphocyte ratio (NLR) | Neutrophil (/μl) / lymphocyte (/μl) | | |
| Lymphocyte-to-monocyte ratio (LMR) | Lymphocyte (/μl) / monocyte (/μl) | | |
| Platelet-to-lymphocyte ratio (PLR) | Platelet (/μl) / lymphocyte (/μl) | | |
| Systemic immune-inflammation index (SII) | Platelet (/μl) × neutrophil (/μl) / lymphocyte (/μl) | | |
| Systemic inflammation response index (SIRI) | Neutrophil (/μl) × monocyte (/μl) / lymphocyte (/μl) | | |
| Neutrophil-albumin ratio (NAR) | Neutrophil (/μl) / albumin (g/dl) | | |
| Lymphocyte × albumin (LA) | Lymphocyte (/μl) × albumin (g/dl) | | |
| Neutrophil × monocyte (NM) | Neutrophil (/μl) × monocyte (/μl) | | |
| Neutrophil × platelet (NP) | Neutrophil (/μl) × platelet (/μl) | | |
| Monocyte × platelet (MP) | Monocyte (/μl) × platelet (/μl) | | |
| Systemic inflammation score (SIS) | Albumin (g/dl) | LMR | Score |
| ≥ 4 | ≥ 4.44 | 0 |
| ≥ 4 | < 4.44 | 1 |
| < 4 | ≥ 4.44 | 1 |
| < 4 | < 4.44 | 2 |

Abbreviations: PIV, pan-immune-inflammation value; NLR, neutrophil-to-lymphocyte ratio; LMR, lymphocyte-to-monocyte ratio; PLR, platelet-to-lymphocyte ratio; SII, systemic immune-inflammation index; SIRI, systemic inflammation response index; NAR, neutrophil-to-albumin ratio; LA, lymphocyte × albumin; NM, neutrophil × monocyte; NP, neutrophil × platelet; MP, monocyte × platelet; SIS, systemic inflammation score.

Table S2. Variance inflation factor for variables included in multivariate Cox regression.

| Variable | VIF (OS model) | VIF (DFS model) |
| --- | --- | --- |
| PIV (High vs. Low) | 1.32 | 1.28 |
| CEA (≥ 5 ng/ml vs. < 5 ng/ml) | 1.41 | 1.39 |
| CA19-9 (≥ 37 U/ml vs. < 37 U/ml) | 1.36 | 1.34 |
| Perineural invasion (Yes vs. No) | 1.22 | 1.21 |
| TNM (III vs. I/II) | 1.27 | 1.25 |

Abbreviations: PIV, pan-immune-inflammation value; CEA, carcinoembryonic antigen; CA19-9, carbohydrate antigen 19-9; TNM, tumor-node-metastasis; OS, overall survival; DFS, disease-free survival; VIF, variance inflation factor.

Table S3. Forest plots of hazard ratios between high and low PIV for OS and DFS in different subgroups (high PIV as reference).

| Variable | Overall survival | | Disease free survival | |
| --- | --- | --- | --- | --- |
| HR (95%CI) | P value | HR (95%CI) | P value |
| Age |  |  |  |  |
| < 60 year | 0.292(0.177,0.482) | <0.001 | 0.319(0.203,0.500) | <0.001 |
| ≥ 60 year | 0.369(0.227,0.600) | <0.001 | 0.401(0.258,0.623) | <0.001 |
| Gender |  |  |  |  |
| Female | 0.290(0.144,0.586) | <0.001 | 0.324(0.175,0.599) | <0.001 |
| Male | 0.345(0.231,0.517) | <0.001 | 0.369(0.256,0.533) | <0.001 |
| Obstructive jaundice |  |  |  |  |
| No | 0.284(0.157,0.515) | <0.001 | 0.270(0.156,0.468) | <0.001 |
| Yes | 0.349(0.226,0.538) | <0.001 | 0.413(0.281,0.608) | <0.001 |
| HBV infection |  |  |  |  |
| Yes | 0.281(0.120,0.658) | 0.003 | 0.208(0.091,0.475) | <0.001 |
| No | 0.327(0.223,0.481) | <0.001 | 0.371(0.264,0.522) | <0.001 |
| CEA |  |  |  |  |
| ≥ 5 ng/ml | 0.841(0.427,0.914) | 0.015 | 0.813(0.411,0.958) | 0.042 |
| < 5 ng/ml | 0.282(0.188,0.425) | <0.001 | 0.336(0.235,0.480) | <0.001 |
| CA19-9 |  |  |  |  |
| ≥ 37 U/ml | 0.426(0.292,0.621) | <0.001 | 0.421(0.297,0.597) | <0.001 |
| < 37 U/ml | 0.167(0.068,0.412) | <0.001 | 0.271(0.132,0.556) | <0.001 |
| Differentiation |  |  |  |  |
| Poor | 0.502(0.297,0.848) | 0.009 | 0.468(0.280,0.781) | 0.004 |
| Well/Moderate | 0.244(0.151,0.395) | <0.001 | 0.309(0.207,0.462) | <0.001 |
| Perineural invasion |  |  |  |  |
| No | 0.244(0.155,0.384) | <0.001 | 0.308(0.209,0.454) | <0.001 |
| Yes | 0.523(0.297,0.920) | 0.025 | 0.464(0.269,0.801) | 0.006 |
| TNM |  |  |  |  |
| I/II | 0.242(0.145,0.403) | <0.001 | 0.305(0.200,0.467) | <0.001 |
| III | 0.495(0.307,0.800) | 0.004 | 0.470(0.295,0.749) | 0.001 |

Abbreviations: PIV, pan-immune-inflammation value; CEA, carcinoembryonic antigen; CA19-9, carbohydrate antigen 19-9; TNM, tumor-node-metastasis; OS, overall survival; DFS, disease-free survival.

**Supplementary Figure**

Figure S1. Flow chart of patient selection in this study.


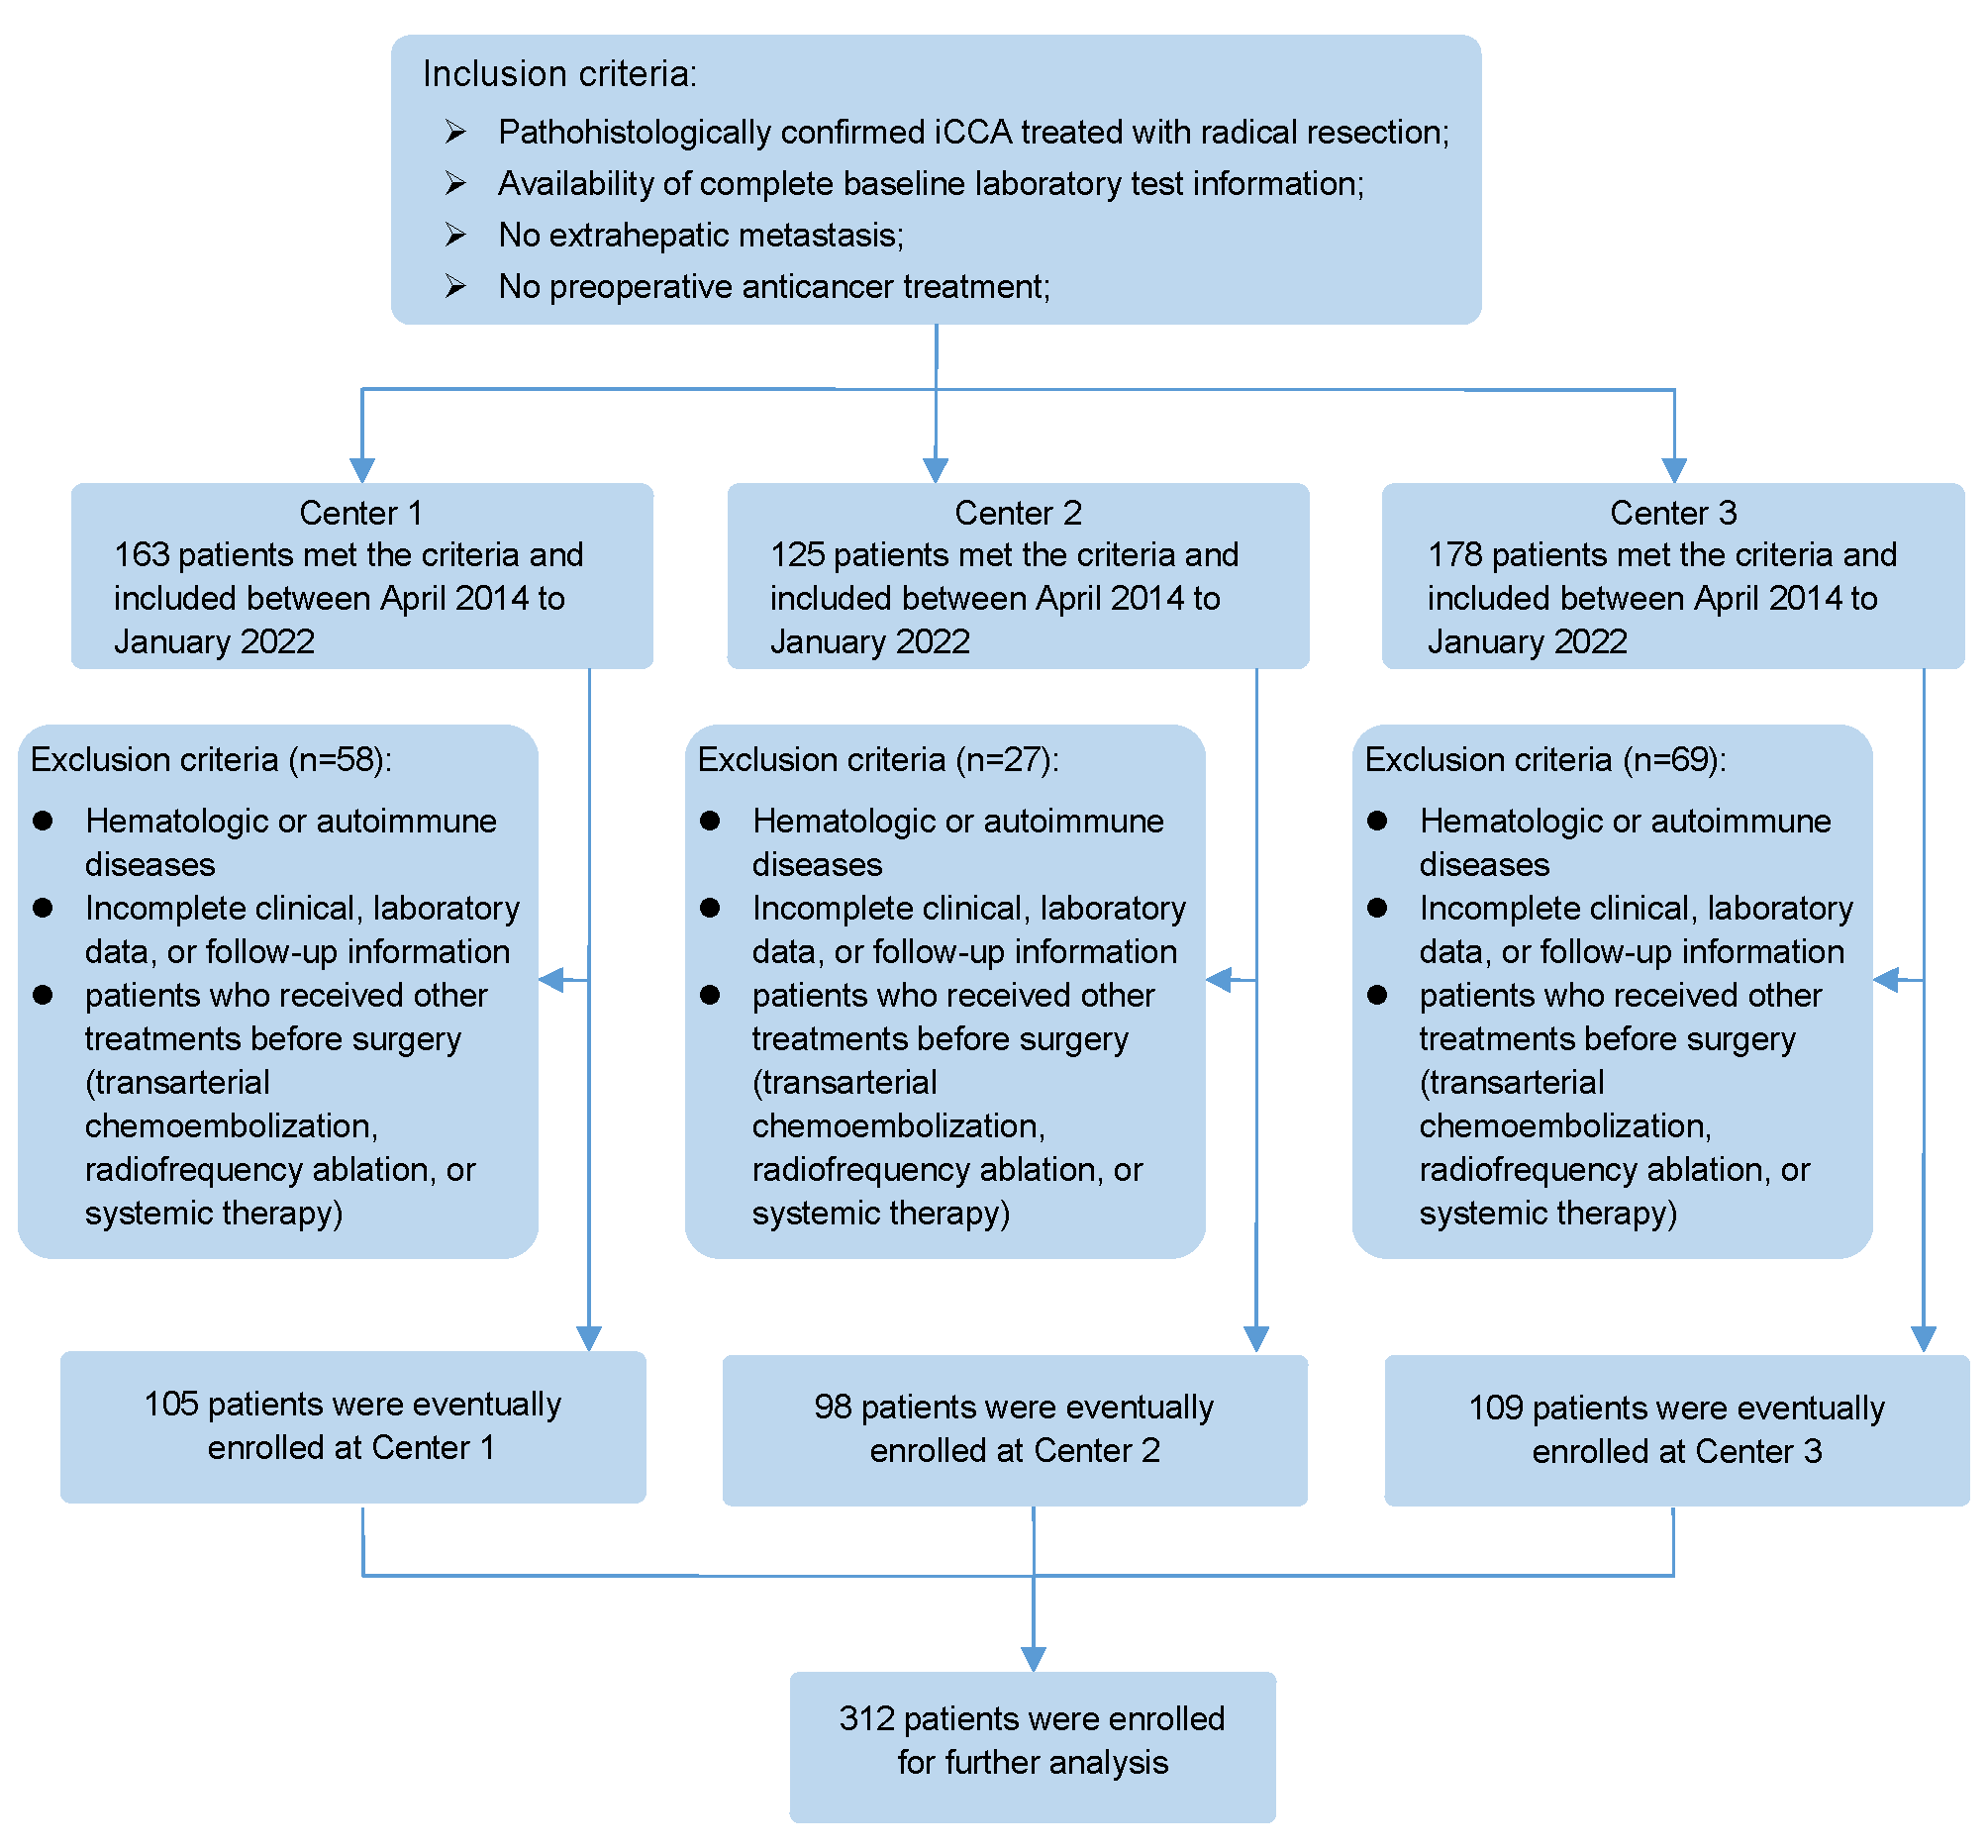


Notes: iCCA, intrahepatic cholangiocarcinoma; Center 1, The Affiliated Hospital of Jiangnan University; Center 2, The Affiliated Suzhou Hospital of Nanjing Medical University; Center 3, Harbin Medical University Cancer Hospital.


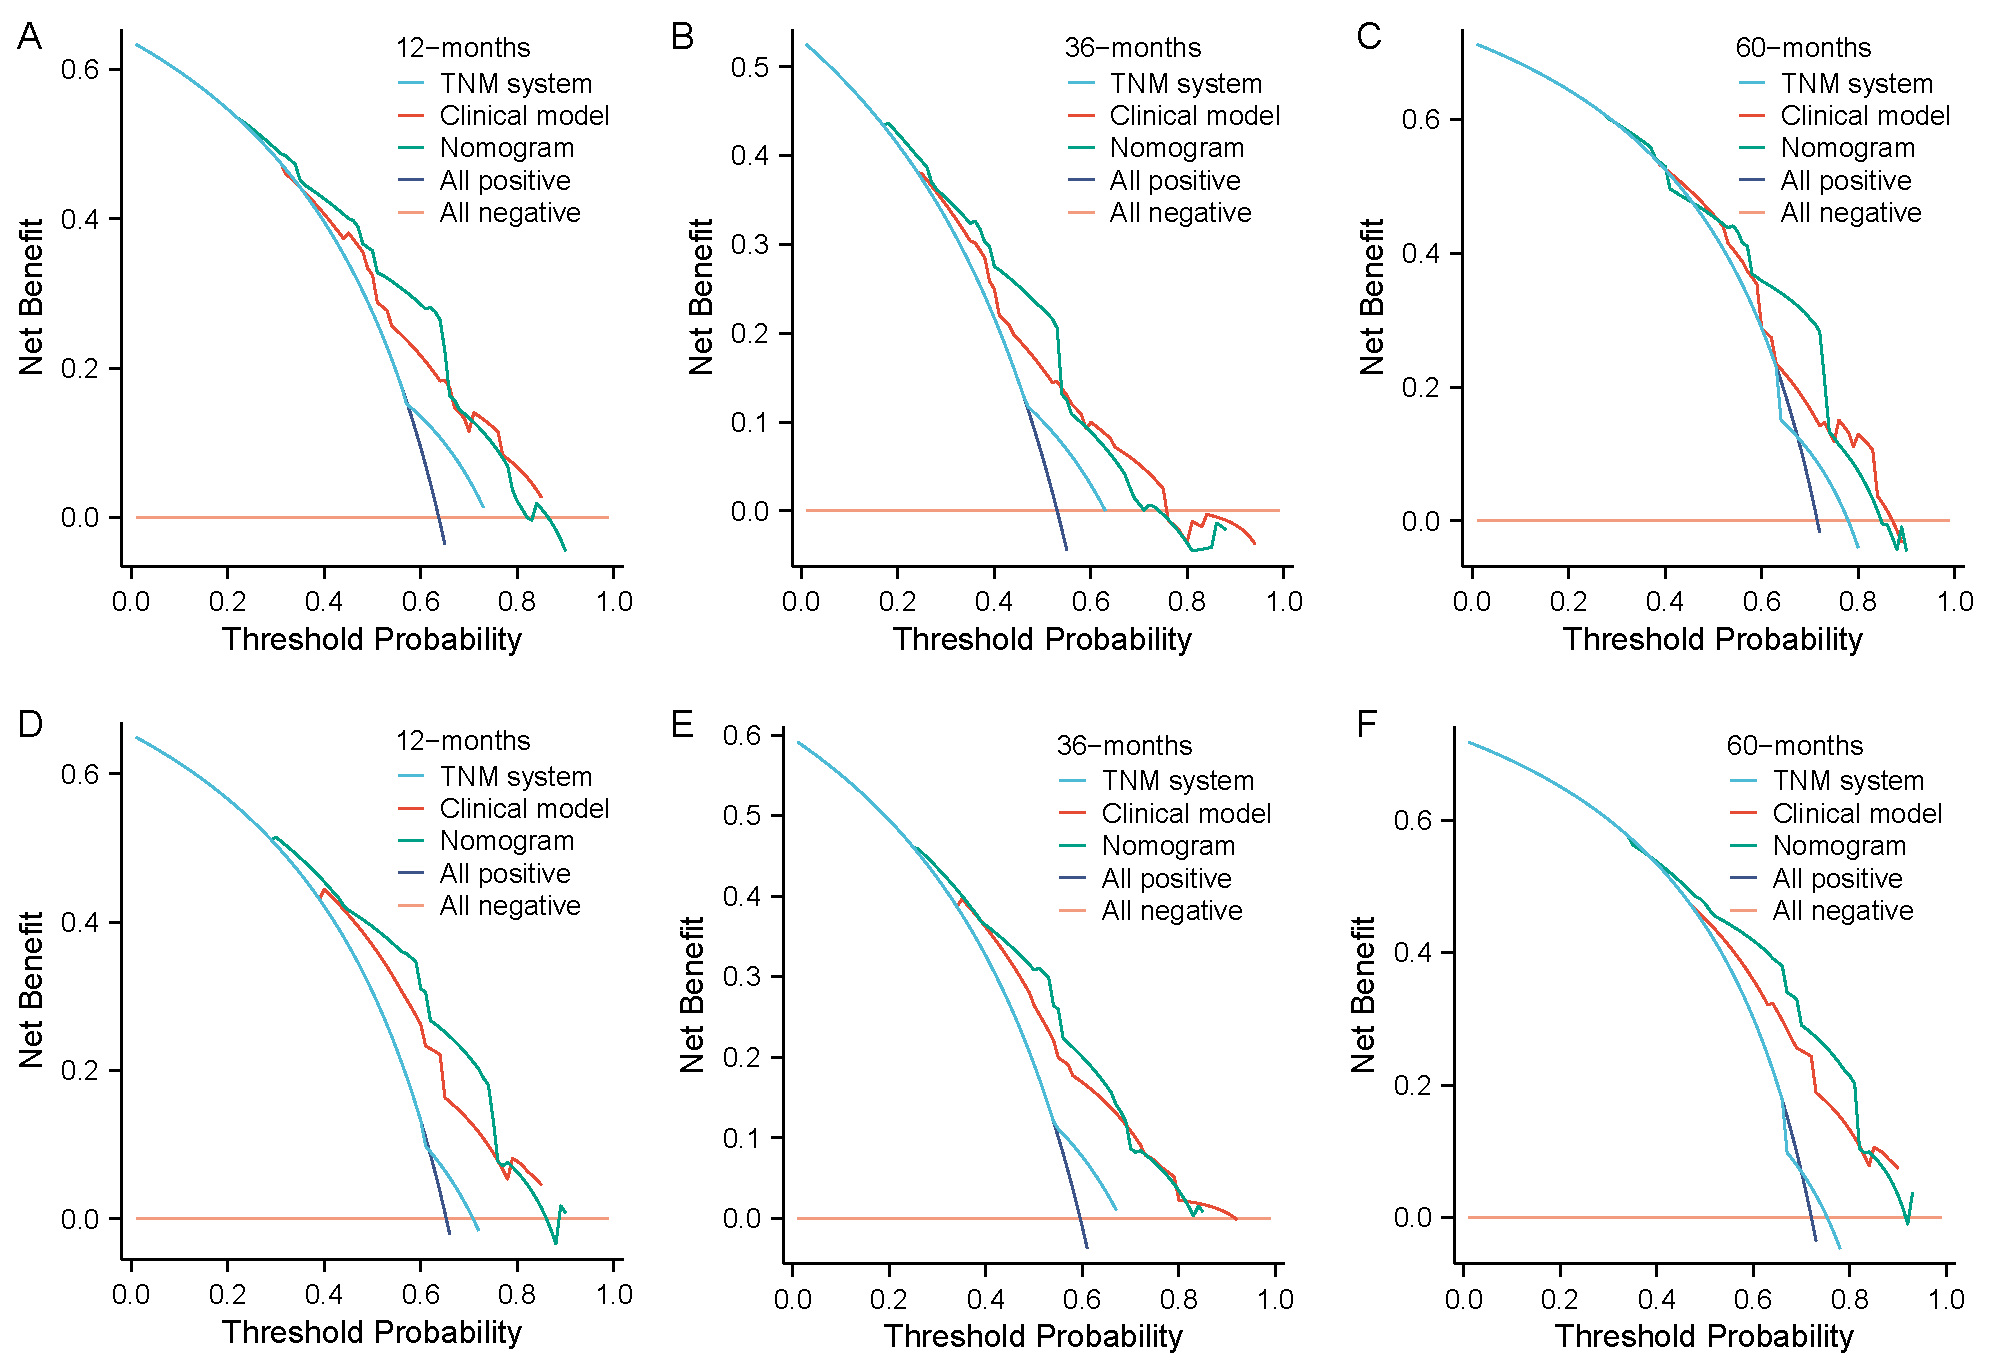


Figure S2. Decision curve analysis (DCA) of overall survival (OS) and disease-free survival (DFS) prediction by the nomograms. The DCA of the nomogram for 12-month OS (A), 36-month OS (B), and 60-month OS (C) and for 12-month DFS (D), 36-month DFS (E), and 60-month DFS (F).
